# Supplementary material
Source: PubMed Central journal article supplement (PMC5897633)
Supplement: rspb20172650supp1.pdf [file rspb20172650supp1.pdf]

1 **Supplementary file**

2 **Effect of elevated CO<sub>2</sub> and small boat noise on the kinematics of predator–prey**  
3 **interactions**

4 Mark I. McCormick, Sue-Ann Watson, Stephen D. Simpson, Bridie J. M. Allan

5

6 **CO<sub>2</sub> treatment**

7 CO<sub>2</sub> treatments were maintained by CO<sub>2</sub> dosing to a set pH<sub>NBS</sub>. Seawater was pumped from the  
8 ocean into 60 L header tanks where it was diffused with ambient air (control) or CO<sub>2</sub> to achieve  
9 a pH of 7.86. The pH value was selected to achieve the approximate CO<sub>2</sub> conditions required,  
10 based on preliminary observations of total alkalinity, salinity and temperature of seawater at  
11 Lizard Island. A pH-controller (pH computer, Aqua Medic, Germany) was attached to the CO<sub>2</sub>  
12 treatment sump to maintain pH at the desired level. A solenoid injected a slow stream of CO<sub>2</sub>  
13 into a powerhead at the bottom of the header tank whenever the pH of the seawater rose above  
14 the set point. Equilibrated seawater from each sump was supplied at a rate of 950ml.min<sup>-1</sup> to  
15 ten replicate 35 L aquariums, two housing small groups of *Pomacentrus wardi* and eight  
16 housing small groups of *Pseudochromis fuscus* isolated from one another in plastic and mesh  
17 containers to minimise stress. Temperature and pH<sub>NBS</sub> of each aquarium was measured daily  
18 using a handheld temperature probe (C26, Comark, Norwich, U.K.) and pH meter (SevenGo  
19 Pro pH/Ion, Mettler Toledo) with glass electrode (InLab®413 S8, Mettler Toledo) calibrated  
20 with NBS buffers. Seawater CO<sub>2</sub> was confirmed with a portable CO<sub>2</sub> equilibrator and non-  
21 dispersive infrared (NDIR) gas analyser (GMP-343, Vaisala, Helsinki, Finland) (for method  
22 details see Watson et al. 2017) Total alkalinity of seawater was determined by Gran titration  
23 (888 Titrando, Metrohm, Switzerland) from water samples taken from control and treatment  
24 tanks. Alkalinity standardizations achieved accuracy within 1% of certified reference material

25 from Prof. A.G. Dickson (Scripps Institution of Oceanography, U.S., batch number 136).  
 26 Salinity data were obtained from moorings within the Lizard Island group (Australian Institute  
 27 of Marine Science). Average seawater  $p\text{CO}_2$  was calculated from seawater parameters in the  
 28 program CO2SYS (Pierrot et al. 2006) using the constants K1, K2 from Mehrbach *et al.* (1973)  
 29 refit by Dickson and Millero (1987). Seawater parameters are shown in Table S1.

30 **Table S1: Seawater carbonate chemistry parameters for each treatment** (mean  $\pm$  s.e.;  
 31 values to nearest integer, 1 or 2 d.p.).

32  
 33  
 34

| Treatment                | Temperature<br>(°C) | Salinity          | pH <sub>NBS</sub>  | Total alkalinity<br>( $\mu\text{mol.kg}^{-1}$ SW) | $p\text{CO}_2$ ( $\mu\text{atm}$ ) from<br>pH <sub>NBS</sub> |
|--------------------------|---------------------|-------------------|--------------------|---------------------------------------------------|--------------------------------------------------------------|
| Ambient CO <sub>2</sub>  | 26.4 ( $\pm$ 0.4)   | 35.4 ( $\pm$ 0.0) | 8.18 ( $\pm$ 0.01) | 2230.6 ( $\pm$ 24.3)                              | 384.3 ( $\pm$ 8.5)                                           |
| Elevated CO <sub>2</sub> | 26.3 ( $\pm$ 0.4)   | 35.4 ( $\pm$ 0.0) | 7.86 ( $\pm$ 0.00) | 2221.6 ( $\pm$ 21.1)                              | 925.0 ( $\pm$ 3.7)                                           |

35

### 36 **References used in Supplementary file**

37 Dickson AG, Millero FJ. 1987 A comparison of the equilibrium constants for the dissociation of  
 38 carbonic acid in seawater media. *Deep-Sea Res.* **34**, 1733-1743.

39 Mehrbach C, Culberson CH, Hawley JE, Pytkowicz RM. 1973 Measurement of the apparent  
 40 dissociation constants of carbonic acid in seawater at atmospheric pressure. *Limnol.*  
 41 *Oceanogr.* **18**, 897–907.

42 Pierrot D, Lewis E, Wallace DWR. 2006 MS Excel program developed for CO<sub>2</sub> system calculations.  
 43 Oak Ridge, Tennessee, U.S.A., ORNL/CDIAC-105a. Carbon Dioxide Information Analysis  
 44 Center, Oak Ridge National Laboratory, U.S. Department of Energy.

45 Watson SA, Fabricius KE, Munday PL. 2017 Quantifying pCO<sub>2</sub> in biological ocean acidification  
 46 experiments: A comparison of four methods. *PloS ONE* **12**, 16.  
 47 (doi:10.1371/journal.pone.0185469).

48  
 49  
 50 **Table S2.** Comparison of the effects of CO<sub>2</sub> pre-treatment (400, 950 μatm) and sound regime  
 51 (ambient reef, boat) on the kinematics of the interaction between juvenile damselfish prey  
 52 (*Pomacentrus wardi*) and dottedback predator (*Pseudochromis fuscus*). Only those variable  
 53 with significant effects are shown. Given (in order) are F, p (p < 0.05 in bold) and partial eta-  
 54 squared (i.e., effect size). Tests were undertaken with 1 and 68df.

| Variable                 | CO <sub>2</sub>           | Sound             | Sound x CO <sub>2</sub> |
|--------------------------|---------------------------|-------------------|-------------------------|
| Predator attack distance | 4.37, <b>0.040</b> , 0.06 | 1.90, 0.173, 0.03 | 1.29, 0.259, 0.02       |
| Predator attack speed    | 5.93, <b>0.017</b> , 0.08 | 1.60, 0.209, 0.02 | 3.85, 0.054, 0.05       |
| ALT                      | 4.39, <b>0.040</b> , 0.06 | 0.58, 0.450, 0.01 | 0.42, 0.518, 0.01       |

55

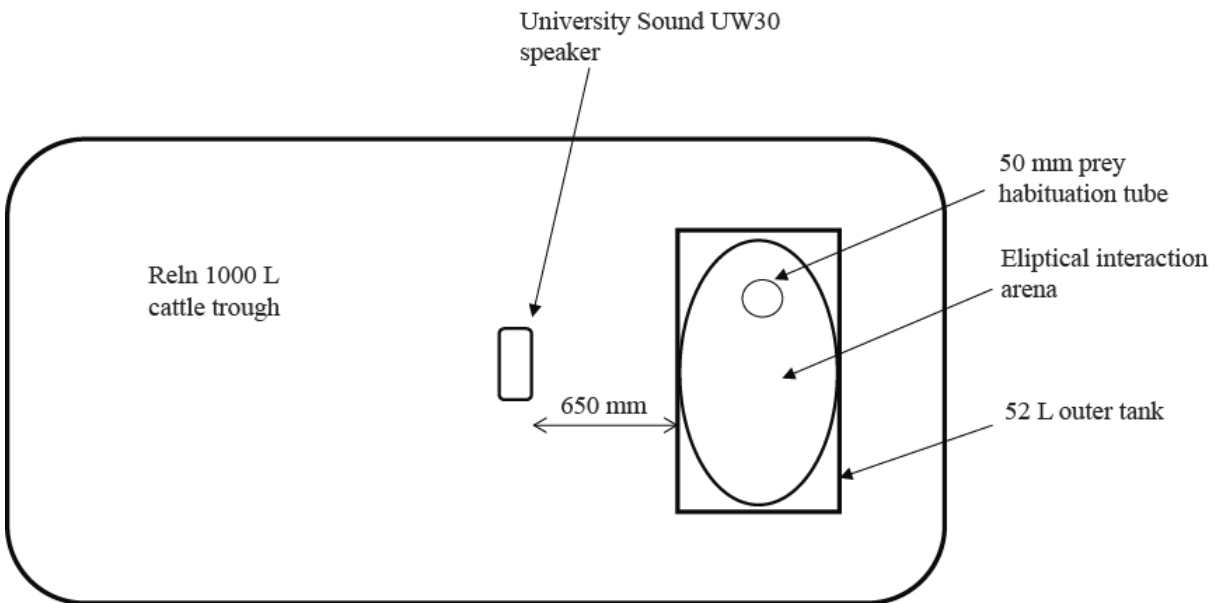

56

57 **Figure S1.** Experimental setup of the noise mesocosm and predator–prey arena.
